# Supplementary material for: Inferring interaction type in gene regulatory networks using co-expression data
Source: Springer Nature journal article supplement (doi:10.1186/s13015-015-0054-4), 2015-07-07
Supplement: 13015_2015_54_MOESM1_ESM.pdf [file 13015_2015_54_MOESM1_ESM.pdf]

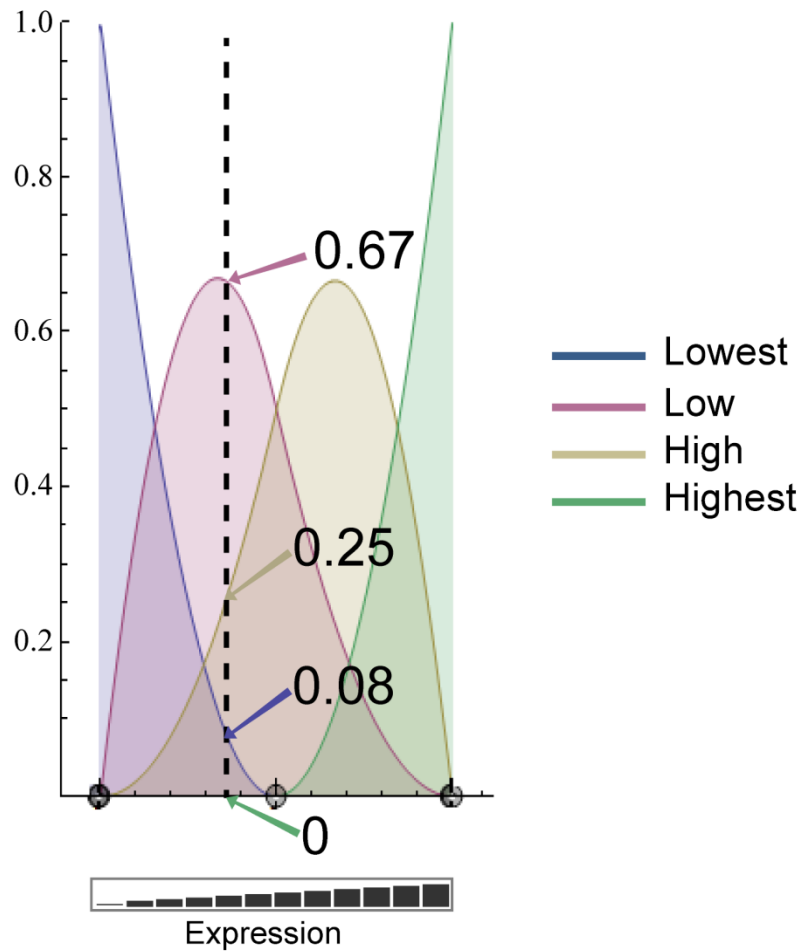

**Figure S1. Schematic representation of B-spline discretization method.** In this figure, data are discretized to 4 bins (Lowest, Low, High, Highest) and the B-spline order is equal to 3. As shown, bins have overlap with each other. The dashed line represents a sample data point. The place that dashed line intersect with each bin, determines the weight of that bin. Note that sum of weights is always equal to one.

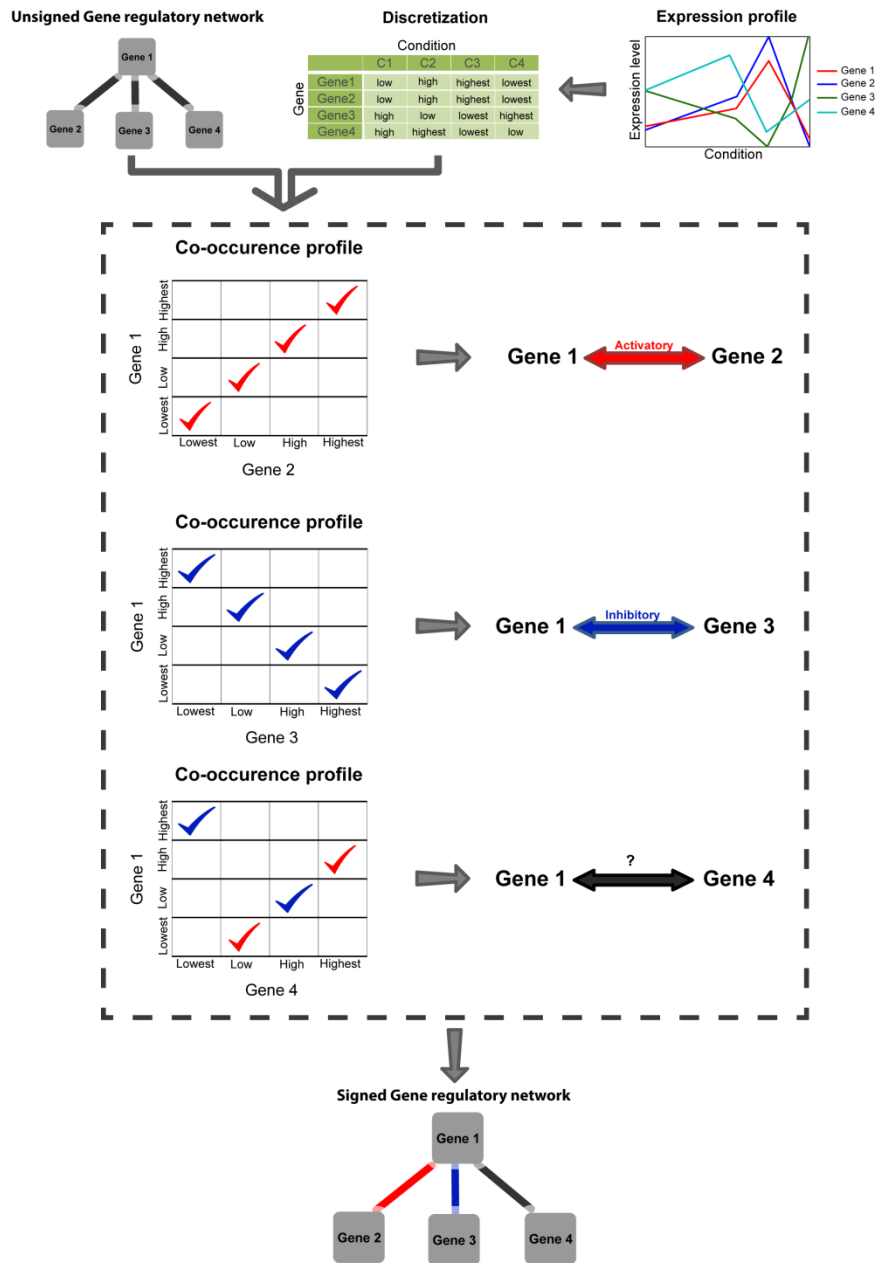

**Figure S2. Schematic representation of SIREN algorithm.** Given a GRN and corresponding transcriptome dataset, SIREN starts with discretization of continuous transcriptome data. Next, SIREN constructs a co-occurrence profile for each interacting genes in the GRN. Based on the patterns of co-occurrence, SIREN determines the type of interaction (Inhibitory or activatory).
